# Supplementary material
Source: PubMed Central journal article supplement (PMC7534954)
Supplement: NIHMS1632546-supplement-1.pdf [file NIHMS1632546-supplement-1.pdf]

## Supplemental Data

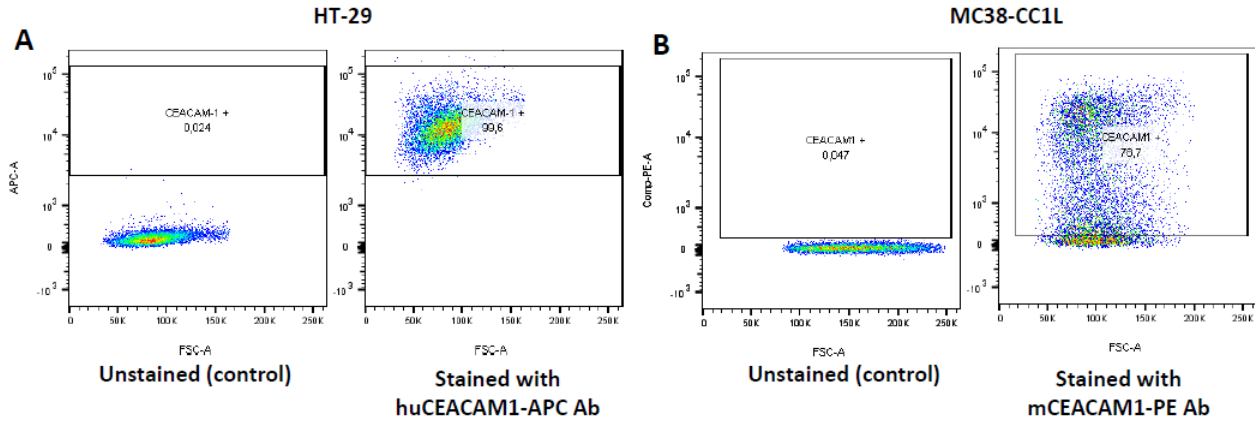

**Figure S1. CEACAM 1 is present on the colon carcinoma cell lines.** **A.** Flow cytometry of human CC1 on human colon carcinoma cell line (HT-29) shows ~100% stained CC1 on the surface of the cells (bottom panel) as compared to the unstained control (top panel). **B.** Flow cytometry of murine CC1 on murine colon carcinoma cell line MC38 shows ~75% stained CC1 on the surface of the cells (bottom panel) as compared to the unstained control (top panel).

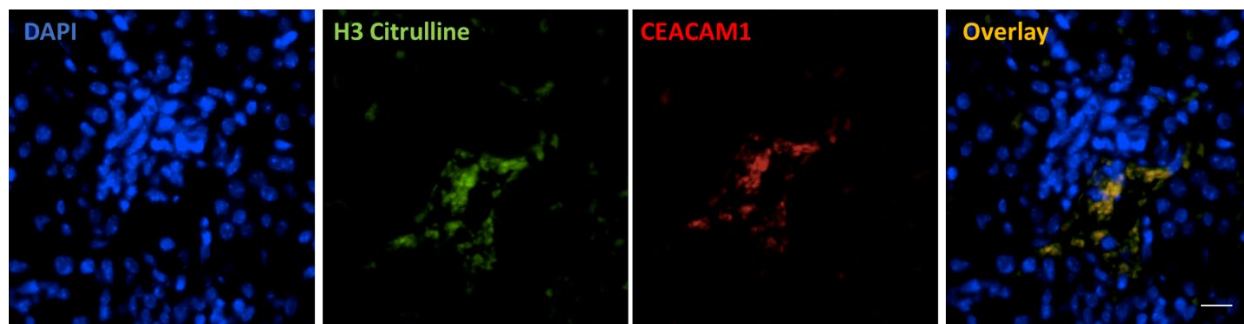

**Figure S2. CEACAM1 is present on NETs *in vivo*.** Multi-IF using DAPI (in blue), H3Citrulline (NETs marker, in green) and CEACAM1 (in red) was performed on liver extracted from a mouse 24h post cecal-ligation-puncture. Images were acquired with a 20x magnification using the EVOS cell imaging system, scale bar: 25  $\mu$ m.

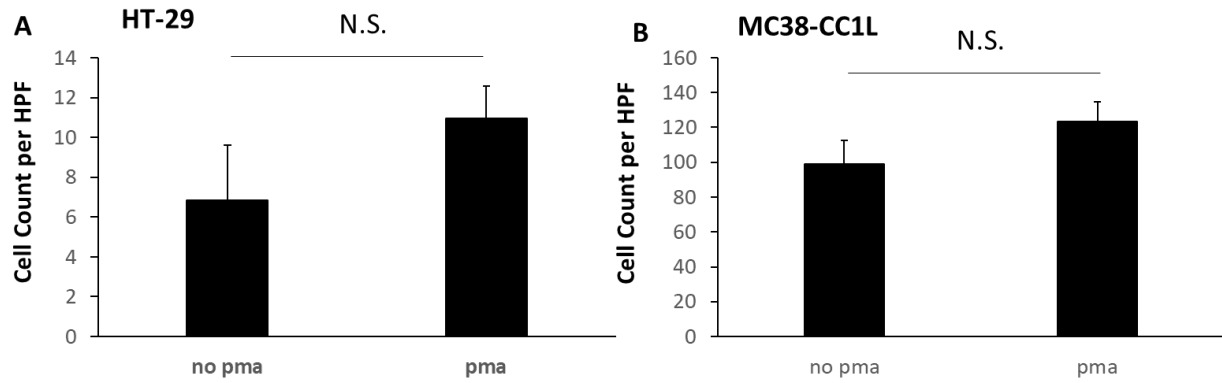

**Figure S3. PMA does not affect tumor cell migration in the absence of neutrophils. A.** Bar graph of average (+/- SEM) number of HT-29 cells migrating towards 10% FBS in the presence or absence of 500 nM PMA in Boyden chambers (n=5, N.S.=not significant). **B.** Bar graph of average (+/- SEM) number of MC38-CC1L cells migrating towards 10% FBS in the presence or absence of 500 nM PMA in Boyden chambers (n=3, N.S.=not significant).

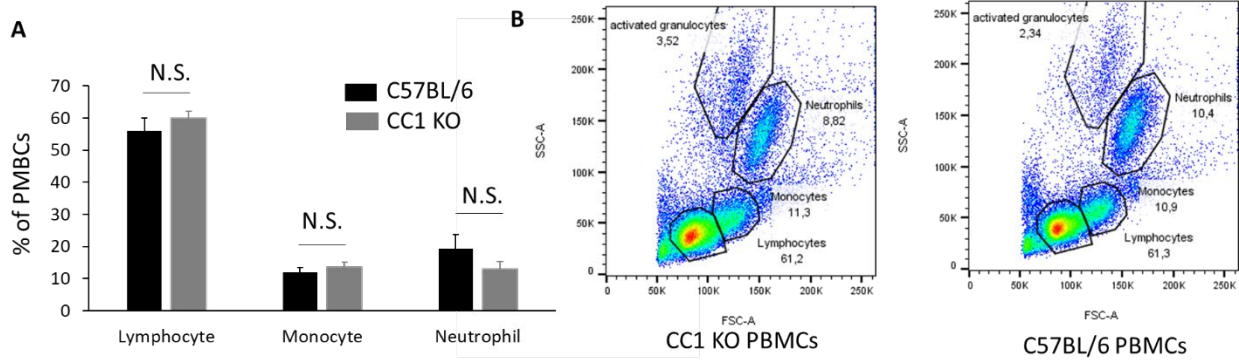

**Figure S4. CC1 KO and C57BL/6 neutrophils have the same number of neutrophils in circulation.** **A.** Bar graph from flow cytometry performed on circulating WBCs extracted from C57BL/6 and CC1 KO mice. n=3, N.S.= Not significant. **B.** Representative flow cytometry profiles of the circulating WBC populations in C57BL/6 and CC1 KO mice.

Table S1. List of identified proteins on huNETs using tandem Mass Spectrometry. Shown in table S1 is a list of the 583 proteins identified by tandem Mass Spectrometry as present on all the 3 NET samples isolated from 3 different healthy individuals.

| #   | Identified Proteins (583)                                                                                                                                                    | Accession Number |
|-----|------------------------------------------------------------------------------------------------------------------------------------------------------------------------------|------------------|
| 1   | isoform H17   HomoSapiens   GN=MPO PE=1 SV=250                                                                                                                               | P05164 (+2)      |
| 2   | peroxidase isoform Iso 1   HomoSapiens   GN=EPX PE=1 SV=77                                                                                                                   | P11678           |
| 3   | isoform Iso 1   HomoSapiens   GN=LTF PE=1 SV=91                                                                                                                              | P02788           |
| 4   | alpha-M isoform Iso 1   HomoSapiens   GN=ITGAM PE=1 SV=74                                                                                                                    | P11215           |
| 5   | G isoform Iso 1   HomoSapiens   GN=CTSG PE=1 SV=69                                                                                                                           | P08311           |
| 6   | S100-A9 isoform Iso 1   HomoSapiens   GN=S100A9 PE=1 SV=68                                                                                                                   | P06702           |
| 7   | cytoplasmic 1 isoform Iso 1   HomoSapiens   GN=ACTB PE=1 SV=160                                                                                                              | P60709 (+1)      |
| 8   | isoform Iso 1   HomoSapiens   GN=MYH9 PE=1 SV=238                                                                                                                            | P35579           |
| 9   | elastase isoform Iso 1   HomoSapiens   GN=ELANE PE=1 SV=77                                                                                                                   | P08246           |
| 10  | S100-A8 isoform Iso 1   HomoSapiens   GN=S100A8 PE=1 SV=56                                                                                                                   | P05109           |
| 11  | subunit beta isoform Iso 1   HomoSapiens   GN=HBB PE=1 SV=149                                                                                                                | P68871           |
| 12  | A6 isoform Iso 1   HomoSapiens   GN=ANXA6 PE=1 SV=92                                                                                                                         | P08133           |
| 13  | elastase inhibitor isoform Iso 1   HomoSapiens   GN=SERPIN1 PE=1 SV=53                                                                                                       | P03740           |
| 14  | band 7 integral membrane protein isoform Iso 1   HomoSapiens   GN=STOM PE=1 SV=58                                                                                            | P27105           |
| 15  | beta-2 isoform Iso 1   HomoSapiens   GN=ITGB2 PE=1 SV=183                                                                                                                    | P05107           |
| 16  | isoform Iso 1   HomoSapiens   GN=LCP1 PE=1 SV=112                                                                                                                            | P13796           |
| 17  | isoform Iso 1   HomoSapiens   GN=AZU1 PE=1 SV=29                                                                                                                             | P02160           |
| 18  | isoform Iso 1   HomoSapiens   GN=FLNA PE=1 SV=231                                                                                                                            | P21333 (+1)      |
| 19  | cationic protein isoform Iso 1   HomoSapiens   GN=RNASE3 PE=1 SV=30                                                                                                          | P12724           |
| 20  | disulfide-isomerase isoform Iso 1   HomoSapiens   GN=PAHB PE=1 SV=95                                                                                                         | P07237           |
| 21  | isoform Iso 1   HomoSapiens   GN=ACTN1 PE=1 SV=176                                                                                                                           | P12814           |
| 22  | H4 isoform Iso 1   HomoSapiens   GN=HIST1H4A;HIST1H4B;HIST1H4C;HIST1H4D;HIST1H4E;HIST1H4F;HIST1H4H;HIST1H4I;HIST1H4J;HIST1H4K;HIST1H4L;HIST2H4A;HIST2H4B;HIST4H4 PE=1 SV=188 | P62805           |
| 23  | GTPase-activating-like protein IQGAP1 isoform Iso 1   HomoSapiens   GN=IQGAP1 PE=1 SV=136                                                                                    | P46940           |
| 24  | permeability-increasing protein isoform Iso 1   HomoSapiens   GN=BPI PE=1 SV=30                                                                                              | P17213           |
| 25  | b-245 heavy chain isoform Iso 1   HomoSapiens   GN=CYBB PE=1 SV=82                                                                                                           | P04839           |
| 26  | isoform Iso 1   HomoSapiens   GN=PRTN3 PE=1 SV=60                                                                                                                            | P24158           |
| 27  | A1 isoform Iso 1   HomoSapiens   GN=ANXA1 PE=1 SV=77                                                                                                                         | P04083           |
| 28  | tyrosine-protein phosphatase C isoform Iso 1   HomoSapiens   GN=PTPRC PE=1 SV=143                                                                                            | P08575 (+1)      |
| 29  | isoform Iso 1   HomoSapiens   GN=TLN1 PE=1 SV=202                                                                                                                            | Q9Y490           |
| 30  | defensin 1 isoform Iso 1   HomoSapiens   GN=DEFA1;DEFA1B PE=1 SV=51                                                                                                          | P59665 (+1)      |
| 31  | marrow proteoglycan isoform Iso 1   HomoSapiens   GN=PRG2 PE=1 SV=54                                                                                                         | P13727           |
| 32  | subunit alpha isoform Iso 1   HomoSapiens   GN=HBA1;HBA2 PE=1 SV=295                                                                                                         | P69905           |
| 33  | C isoform Iso 1   HomoSapiens   GN=LZY PE=1 SV=130                                                                                                                           | P61626           |
| 34  | kDa glucose-regulated protein isoform Iso 1   HomoSapiens   GN=HSPA5 PE=1 SV=109                                                                                             | P11021           |
| 35  | intestinal isoform Iso 1   HomoSapiens   GN=MGAM PE=1 SV=72                                                                                                                  | Q43451           |
| 36  | nucleotide-binding protein (G) subunit alpha-2 isoform Iso 1   HomoSapiens   GN=GNAI2 PE=1 SV=81                                                                             | P04899           |
| 37  | ribonuclease isoform Iso 1   HomoSapiens   GN=RNASE2 PE=1 SV=53                                                                                                              | P10153           |
| 38  | A3 isoform Iso 1   HomoSapiens   GN=ANXA3 PE=1 SV=40                                                                                                                         | P12429           |
| 39  | A11 isoform Iso 1   HomoSapiens   GN=ANXA11 PE=1 SV=63                                                                                                                       | P50995           |
| 40  | synthase subunit beta, mitochondrial isoform Iso 1   HomoSapiens   GN=ATP5B PE=1 SV=148                                                                                      | P06576           |
| 41  | kinase isozymes M1/M2 isoform M2   HomoSapiens   GN=PKM2 PE=1 SV=154                                                                                                         | P14618           |
| 42  | isoform Iso 1   HomoSapiens   GN=FLOT2 PE=1 SV=58                                                                                                                            | Q14254           |
| 43  | plasma membrane-associated protein isoform Iso 1   HomoSapiens   GN=APMAP PE=1 SV=59                                                                                         | Q9H0C9           |
| 44  | isoform Iso 1   HomoSapiens   GN=MSN PE=1 SV=112                                                                                                                             | P26038           |
| 45  | isoform Iso 1   HomoSapiens   GN=DYSF PE=1 SV=46                                                                                                                             | O75923 (+13)     |
| 46  | dehydrogenase isoform Iso 1   HomoSapiens   GN=GAPDH PE=1 SV=195                                                                                                             | P04406           |
| 47  | antigen-related cell adhesion molecule 8 isoform Iso 1   HomoSapiens   GN=CEACAM8 PE=1 SV=30                                                                                 | P31997           |
| 48  | H2B type 1-K isoform Iso 1   HomoSapiens   GN=HIST1H2BK PE=1 SV=70                                                                                                           | O60814 (+8)      |
| 49  | alpha-glucosidase AB isoform Iso 1   HomoSapiens   GN=GANAB PE=1 SV=101                                                                                                      | Q14697 (+1)      |
| 50  | type II cytoskeletal 1 isoform Iso 1   HomoSapiens   GN=KRT1 PE=1 SV=165                                                                                                     | P04264           |
| 51  | isoform Iso 1   HomoSapiens   GN=CAT PE=1 SV=94                                                                                                                              | P04040           |
| 52  | isoform Iso 1   HomoSapiens   GN=CANX PE=1 SV=98                                                                                                                             | P27824           |
| 53  | isoform Iso 1   HomoSapiens   GN=PFN1 PE=1 SV=60                                                                                                                             | P07737           |
| 54  | disulfide-isomerase A3 isoform Iso 1   HomoSapiens   GN=PDIA3 PE=1 SV=102                                                                                                    | P30101           |
| 55  | isoform Iso 1   HomoSapiens   GN=CALR PE=1 SV=81                                                                                                                             | P27797           |
| 56  | isoform Iso 1   HomoSapiens   GN=VIM PE=1 SV=136                                                                                                                             | P08670           |
| 57  | metalloproteinase-9 isoform Iso 1   HomoSapiens   GN=MMP9 PE=1 SV=74                                                                                                         | P14780           |
| 58  | shock 70 kDa protein 1A/1B isoform Iso 1   HomoSapiens   GN=HSPA1A;HSPA1B PE=1 SV=163                                                                                        | P08107           |
| 59  | isoform Iso 1   HomoSapiens   GN=GCA PE=1 SV=30                                                                                                                              | P28676           |
| 60  | isoform Iso 1   HomoSapiens   GN=UBB PE=1 SV=62                                                                                                                              | POCG47 (+3)      |
| 61  | isoform Iso 1   HomoSapiens   GN=HSP90B1 PE=1 SV=168                                                                                                                         | P14625           |
| 62  | isoform Iso 1   HomoSapiens   GN=TKT PE=1 SV=107                                                                                                                             | P29401           |
| 63  | isoform Iso 1   HomoSapiens   GN=FLOT1 PE=1 SV=90                                                                                                                            | O75955           |
| 64  | carrier family 2, facilitated glucose transporter member 3 isoform Iso 1   HomoSapiens   GN=SLC2A3 PE=1 SV=47                                                                | P11169           |
| 65  | isoform Iso 1   HomoSapiens   GN=SERPINA1 PE=1 SV=663                                                                                                                        | P01009           |
| 66  | isoform Iso 2   HomoSapiens   GN=GSN PE=1 SV=171                                                                                                                             | P06396.2         |
| 67  | isoform Iso 1   HomoSapiens   GN=CPNE3 PE=1 SV=48                                                                                                                            | O75131           |
| 68  | phosphorylase, liver form isoform Iso 1   HomoSapiens   GN=PYGL PE=1 SV=104                                                                                                  | P06737           |
| 69  | isoform alpha-enolase   HomoSapiens   GN=ENO1 PE=1 SV=150                                                                                                                    | P06733           |
| 70  | gelatinase-associated lipocalin isoform Iso 1   HomoSapiens   GN=LCN2 PE=1 SV=62                                                                                             | P80188           |
| 71  | A4 isoform Iso 1   HomoSapiens   GN=ANXA4 PE=1 SV=47                                                                                                                         | P09525           |
| 72  | beta chain isoform Iso 1   HomoSapiens   GN=TUBB PE=1 SV=161                                                                                                                 | P07437           |
| 73  | alpha-1B chain isoform Iso 1   HomoSapiens   GN=TUBA1B PE=1 SV=217                                                                                                           | P68363           |
| 74  | isoform Iso 1   HomoSapiens   GN=CORO1A PE=1 SV=64                                                                                                                           | P31146           |
| 75  | 3 anion transport protein isoform Iso 1   HomoSapiens   GN=SLC4A1 PE=1 SV=54                                                                                                 | P02730           |
| 76  | protein zeta/delta isoform Iso 1   HomoSapiens   GN=YWHAZ PE=1 SV=112                                                                                                        | P63104           |
| 77  | antigen-related cell adhesion molecule 6 isoform Iso 1   HomoSapiens   GN=CEACAM6 PE=1 SV=55                                                                                 | P40199           |
| 78  | synthase subunit alpha, mitochondrial isoform Iso 1   HomoSapiens   GN=ATP5A1 PE=1 SV=97                                                                                     | P25705           |
| 79  | B-like 1 isoform Iso 1   HomoSapiens   GN=PLBD1 PE=1 SV=31                                                                                                                   | Q6P4A8           |
| 80  | protein 3 isoform Iso 1   HomoSapiens   GN=ACTR3 PE=1 SV=63                                                                                                                  | P61158           |
| 81  | cell-expressed membrane protein 1 isoform Iso 1   HomoSapiens   GN=MCEMP1 PE=1 SV=37                                                                                         | Q8IX19           |
| 82  | protein Rap-1b isoform Iso 1   HomoSapiens   GN=RAP1B PE=1 SV=50                                                                                                             | P61224           |
| 83  | C3 botulinum toxin substrate 2 isoform Iso 1   HomoSapiens   GN=RAC2 PE=1 SV=55                                                                                              | P15153           |
| 84  | protein RhoA isoform Iso 1   HomoSapiens   GN=RHOA PE=1 SV=73                                                                                                                | P61586           |
| 85  | type I cytoskeletal 10 isoform Iso 1   HomoSapiens   GN=KRT10 PE=1 SV=134                                                                                                    | P13645           |
| 86  | domain-containing protein 1 isoform Iso 1   HomoSapiens   GN=EHOD1 PE=1 SV=49                                                                                                | Q9H4M9           |
| 87  | aldolase A isoform Iso 1   HomoSapiens   GN=ALDOA PE=1 SV=164                                                                                                                | P04075           |
| 88  | dehydrogenase [NADP], mitochondrial isoform Iso 1   HomoSapiens   GN=IDH2 PE=1 SV=79                                                                                         | P48735           |
| 89  | kinase 1 isoform Iso 1   HomoSapiens   GN=PGK1 PE=1 SV=108                                                                                                                   | P00558           |
| 90  | shock cognate 71 kDa protein isoform Iso 1   HomoSapiens   GN=HSPA8 PE=1 SV=116                                                                                              | P11142           |
| 91  | A5 isoform Iso 1   HomoSapiens   GN=ANXA5 PE=1 SV=85                                                                                                                         | P08758           |
| 92  | protein alpha isoform Iso 1   HomoSapiens   GN=ERO1L PE=1 SV=63                                                                                                              | Q9GHE7           |
| 93  | tyrosine-protein phosphatase eta isoform Iso 1   HomoSapiens   GN=PTPRJ PE=1 SV=112                                                                                          | Q12913           |
| 94  | cis-trans isomerase B isoform Iso 1   HomoSapiens   GN=PIIB PE=1 SV=79                                                                                                       | P23284           |
| 95  | disulfide-isomerase A6 isoform Iso 1   HomoSapiens   GN=PDIA6 PE=1 SV=82                                                                                                     | Q15084 (+1)      |
| 96  | b-245 light chain isoform Iso 1   HomoSapiens   GN=CYBA PE=1 SV=72                                                                                                           | P13498           |
| 97  | alpha chain, brain isoform Iso 1   HomoSapiens   GN=SPTAN1 PE=1 SV=242                                                                                                       | Q13813 (+2)      |
| 98  | H2A type 1-B/E isoform Iso 1   HomoSapiens   GN=HIST1H2AB;HIST1H2AE PE=1 SV=116                                                                                              | P04908 (+2)      |
| 99  | 1-dehydrogenase isoform Short   HomoSapiens   GN=G6PD PE=1 SV=94                                                                                                             | P11413 (+2)      |
| 100 | light polypeptide 6 isoform Smooth muscle   HomoSapiens   GN=MYL6 PE=1 SV=54                                                                                                 | P60660.2         |
| 101 | albumin isoform Iso 1   HomoSapiens   GN=ALB PE=1 SV=474                                                                                                                     | P02768           |
| 102 | isoform Iso 1   HomoSapiens   GN=ACTN4 PE=1 SV=114                                                                                                                           | Q43707           |
| 103 | isoform Iso 1   HomoSapiens   GN=NCSTN PE=1 SV=59                                                                                                                            | Q92542 (+1)      |
| 104 | cyclase-associated protein 1 isoform Iso 1   HomoSapiens   GN=CAP1 PE=1 SV=103                                                                                               | Q01518           |
| 105 | membrane glycoprotein 2 isoform LAMP-2B   HomoSapiens   GN=LAMP2 PE=1 SV=80                                                                                                  | P13473.2         |

|     |                                                                                                             |             |
|-----|-------------------------------------------------------------------------------------------------------------|-------------|
| 106 | dehydrogenase, decarboxylating isoform Iso 1  HomoSapiens  GN=PGD PE=1 SV=78                                | P52209      |
| 107 | 3 isoform Iso 1  HomoSapiens  GN=PRG3 PE=1 SV=24                                                            | Q9Y2Y8      |
| 108 | dehydrogenase A chain isoform Iso 1  HomoSapiens  GN=LDDHA PE=1 SV=109                                      | P00338 (+1) |
| 109 | isoform Iso 1  HomoSapiens  GN=GNS PE=1 SV=74                                                               | P15586      |
| 110 | nucleotide-binding protein G(I)/G(S)/G(T) subunit beta-2 isoform Iso 1  HomoSapiens  GN=GNB2 PE=1 SV=70     | P62879      |
| 111 | 5-lipoxygenase isoform Iso 1  HomoSapiens  GN=ALOX5 PE=1 SV=57                                              | P09917      |
| 112 | mitochondrial isoform Mitochondrial  HomoSapiens  GN=PRDX5 PE=1 SV=100                                      | P30044 (+1) |
| 113 | membrane glycoprotein 1 isoform Iso 1  HomoSapiens  GN=LAMP1 PE=1 SV=69                                     | P11279      |
| 114 | omega-hydroxylase 2 isoform Iso 1  HomoSapiens  GN=CYP4F3 PE=2 SV=45                                        | Q08477      |
| 115 | type I cytoskeletal 9 isoform Iso 1  HomoSapiens  GN=KRT9 PE=1 SV=194                                       | P35527      |
| 116 | isoform Iso 1  HomoSapiens  GN=CFL1 PE=1 SV=73                                                              | P23528      |
| 117 | receptor isoform Iso 1  HomoSapiens  GN=LBR PE=1 SV=59                                                      | Q14739      |
| 118 | N isoform Iso 1  HomoSapiens  GN=ANPEP PE=1 SV=187                                                          | P15144      |
| 119 | cyclase 2 isoform Iso 1  HomoSapiens  GN=BST1 PE=1 SV=57                                                    | Q10588      |
| 120 | isomerase isoform Iso 1  HomoSapiens  GN=GPI PE=1 SV=132                                                    | P06744      |
| 121 | ATPase subunit alpha-1 isoform Long  HomoSapiens  GN=ATP1A1 PE=1 SV=125                                     | P05023      |
| 122 | isoform Iso 2  HomoSapiens  GN=VCL PE=1 SV=121                                                              | P18206 (+1) |
| 123 | myosin-Ib isoform Iso 1  HomoSapiens  GN=MYO1F PE=1 SV=34                                                   | Q00160      |
| 124 | kDa heat shock protein, mitochondrial isoform Iso 1  HomoSapiens  GN=HSPD1 PE=1 SV=102                      | P10809      |
| 125 | acid soluble protein 1 isoform Iso 1  HomoSapiens  GN=BASP1 PE=1 SV=47                                      | P80723      |
| 126 | isoform Long  HomoSapiens  GN=GUSB PE=1 SV=56                                                               | P08236      |
| 127 | neutrophil cytosol factor 1B isoform Iso 1  HomoSapiens  GN=NCF1B PE=5 SV=23                                | A6N172 (+1) |
| 128 | S-transferase P isoform Iso 1  HomoSapiens  GN=GSTP1 PE=1 SV=81                                             | P09211      |
| 129 | family homolog 3 isoform Iso 1  HomoSapiens  GN=FERMT3 PE=1 SV=54                                           | Q86UX7 (+1) |
| 130 | 15-lipoxygenase isoform Iso 1  HomoSapiens  GN=ALOX15 PE=1 SV=56                                            | P16050      |
| 131 | division control protein 42 homolog isoform Iso 2  HomoSapiens  GN=CDC42 PE=1 SV=71                         | P06953.2    |
| 132 | protein 2/3 complex subunit 2 isoform Iso 1  HomoSapiens  GN=ARPC2 PE=1 SV=54                               | Q15144      |
| 133 | light chain isoform Iso 1  HomoSapiens  GN=FTL PE=1 SV=64                                                   | P02792      |
| 134 | synthase, mitochondrial isoform Iso 1  HomoSapiens  GN=CS PE=1 SV=83                                        | O75390      |
| 135 | transporter-like protein 2 isoform Iso 1  HomoSapiens  GN=SLC44A2 PE=1 SV=65                                | Q81WAS (+1) |
| 136 | isoform Iso 1  HomoSapiens  GN=TALDO1 PE=1 SV=75                                                            | P37837      |
| 137 | factor 3 isoform Iso 1  HomoSapiens  GN=ARF3 PE=1 SV=47                                                     | P61204 (+1) |
| 138 | antimicrobial peptide isoform Iso 1  HomoSapiens  GN=CAMP PE=1 SV=41                                        | P49913      |
| 139 | proton ATPase 116 kDa subunit a isoform 3 isoform Long  HomoSapiens  GN=TCIRG1 PE=1 SV=50                   | Q13488      |
| 140 | A-4 hydrolase isoform Iso 1  HomoSapiens  GN=LTA4H PE=1 SV=97                                               | P09960      |
| 141 | antigen-related cell adhesion molecule 1 isoform Iso 1  HomoSapiens  GN=CEACAM1 PE=1 SV=48                  | P13688 (+3) |
| 142 | differentiation marker isoform Iso 1  HomoSapiens  GN=MYADM PE=1 SV=37                                      | Q96597      |
| 143 | antigen isoform Iso 1  HomoSapiens  GN=CD63 PE=1 SV=63                                                      | P08962      |
| 144 | antigen isoform Iso 1  HomoSapiens  GN=CD177 PE=1 SV=19                                                     | Q8N6Q3      |
| 145 | antigen isoform Iso 1  HomoSapiens  GN=CD97 PE=1 SV=121                                                     | P48960 (+2) |
| 146 | GDP-dissociation inhibitor 2 isoform Iso 1  HomoSapiens  GN=ARHGDI2 PE=1 SV=44                              | P52566      |
| 147 | type II cytoskeletal 2 epidermal isoform Iso 1  HomoSapiens  GN=KRT7 PE=1 SV=215                            | P35908      |
| 148 | collagenase isoform Iso 1  HomoSapiens  GN=MMP8 PE=1 SV=55                                                  | P22894      |
| 149 | peroxide reductase, mitochondrial isoform Iso 1  HomoSapiens  GN=PRDX3 PE=1 SV=70                           | P30048      |
| 150 | protein 1 isoform Iso 1  HomoSapiens  GN=TOR1AIP1 PE=1 SV=44                                                | Q5JTV8      |
| 151 | 2 subunit beta isoform Iso 1  HomoSapiens  GN=PRKCSH PE=1 SV=64                                             | P14314      |
| 152 | cytosol factor 4 isoform Iso 1  HomoSapiens  GN=NCF4 PE=1 SV=38                                             | Q15080      |
| 153 | oxidoreductase, mitochondrial isoform Iso 1  HomoSapiens  GN=SQRDL PE=1 SV=68                               | Q9Y6N5      |
| 154 | adhesion molecule 3 isoform Iso 1  HomoSapiens  GN=ICAM3 PE=1 SV=132                                        | P32942      |
| 155 | vesicle membrane protein VAT-1 homolog isoform Iso 1  HomoSapiens  GN=VAT1 PE=1 SV=57                       | Q99536      |
| 156 | polypeptide isoform Sap-mu-0  HomoSapiens  GN=PSAP PE=1 SV=68                                               | P07602 (+2) |
| 157 | GTP-binding protein RhoG isoform Iso 1  HomoSapiens  GN=RHOGE PE=1 SV=52                                    | P84095      |
| 158 | protein subunit alpha-1 isoform Iso 1  HomoSapiens  GN=CAPZ1 PE=1 SV=49                                     | P52907      |
| 159 | isoform Iso 1  HomoSapiens  GN=PRDX2 PE=1 SV=96                                                             | P32119      |
| 160 | 5-lipoxygenase-activating protein isoform Iso 1  HomoSapiens  GN=ALOX5AP PE=1 SV=39                         | P20292      |
| 161 | alpha-3 chain isoform Iso 2  HomoSapiens  GN=TPM3 PE=1 SV=84                                                | P06753.2    |
| 162 | cell nuclear differentiation antigen isoform Iso 1  HomoSapiens  GN=MNDA PE=1 SV=32                         | P41218      |
| 163 | surface antigen CD47 isoform OA3-323  HomoSapiens  GN=CD47 PE=1 SV=51                                       | Q08722 (+3) |
| 164 | isoform Iso 1  HomoSapiens  GN=OLFM4 PE=1 SV=32                                                             | Q6UX06      |
| 165 | cis-trans isomerase A isoform Iso 1  HomoSapiens  GN=PP1A PE=1 SV=92                                        | P62937      |
| 166 | shock protein HSP 90-alpha isoform Iso 1  HomoSapiens  GN=HSP90AA1 PE=1 SV=192                              | P07900 (+1) |
| 167 | glycosyltransferase subunit 1 isoform Iso 1  HomoSapiens  GN=RPN1 PE=1 SV=90                                | P04843      |
| 168 | FAM49B isoform Iso 1  HomoSapiens  GN=FAM49B PE=1 SV=57                                                     | Q9NUO9      |
| 169 | dehydrogenase family 3 member B1 isoform Iso 1  HomoSapiens  GN=ALDH3B1 PE=1 SV=45                          | P43353      |
| 170 | isoform Iso 1  HomoSapiens  GN=HK3 PE=1 SV=44                                                               | P52790      |
| 171 | deaminase type-4 isoform Iso 1  HomoSapiens  GN=PAD1A PE=1 SV=62                                            | Q9UM07      |
| 172 | translocase 2 isoform Iso 1  HomoSapiens  GN=SLC25A5 PE=1 SV=109                                            | P05141      |
| 173 | S100-A12 isoform Iso 1  HomoSapiens  GN=S100A12 PE=1 SV=43                                                  | P80511      |
| 174 | cycle control protein 50A isoform Iso 1  HomoSapiens  GN=TMEM30A PE=1 SV=50                                 | Q9NV96      |
| 175 | malic enzyme, mitochondrial isoform Iso 1  HomoSapiens  GN=ME2 PE=1 SV=76                                   | P23368      |
| 176 | diaphanous homolog 1 isoform Iso 1  HomoSapiens  GN=DIAPH1 PE=1 SV=94                                       | O60610 (+1) |
| 177 | heavy chain 1 isoform Iso 1  HomoSapiens  GN=CLTC PE=1 SV=183                                               | Q00610 (+1) |
| 178 | receptor isoform Iso 1  HomoSapiens  GN=FPRI PE=1 SV=26                                                     | P21462      |
| 179 | protein beta/alpha isoform Long  HomoSapiens  GN=YWHAB PE=1 SV=100                                          | P31946 (+1) |
| 180 | anaphylatoxin chemotactic receptor isoform Iso 1  HomoSapiens  GN=CSAR1 PE=1 SV=65                          | P21730      |
| 181 | dehydrogenase, mitochondrial isoform Iso 1  HomoSapiens  GN=MDH2 PE=1 SV=104                                | P40926      |
| 182 | type II cuticular Hb2 isoform Iso 1  HomoSapiens  GN=KRT82 PE=1 SV=39                                       | Q9NSB4      |
| 183 | protein subunit beta isoform Iso 1  HomoSapiens  GN=CAPZB PE=1 SV=64                                        | P47756 (+1) |
| 184 | glycosyltransferase subunit 2 isoform Iso 1  HomoSapiens  GN=RPN2 PE=1 SV=86                                | P04844 (+1) |
| 185 | alpha-mannosidase isoform Iso 1  HomoSapiens  GN=MAN2B1 PE=1 SV=78                                          | O00754      |
| 186 | non-inflammatory molecule 2 isoform Iso 1  HomoSapiens  GN=VNN2 PE=1 SV=44                                  | Q95498      |
| 187 | regulatory light chain 12B isoform Iso 1  HomoSapiens  GN=MYL12B PE=1 SV=46                                 | O14950 (+1) |
| 188 | reticulum resident protein 29 isoform Iso 1  HomoSapiens  GN=ERP29 PE=1 SV=55                               | P30040      |
| 189 | endoplasmic reticulum ATPase isoform Iso 1  HomoSapiens  GN=VCP PE=1 SV=138                                 | P55072      |
| 190 | isoform Iso 1  HomoSapiens  GN=CALM1;CALM2;CALM3 PE=1 SV=126                                                | P62158      |
| 191 | kinase HCK isoform Iso 1  HomoSapiens  GN=HCK PE=1 SV=76                                                    | P08631 (+3) |
| 192 | nucleotide-binding protein G(s) subunit alpha isoforms XLas isoform XLas-1  HomoSapiens  GN=GNAS PE=1 SV=65 | Q51WF2 (+4) |
| 193 | ceramidase isoform Iso 1  HomoSapiens  GN=ASAH1 PE=1 SV=80                                                  | Q13510 (+1) |
| 194 | 1 isoform Iso 1  HomoSapiens  GN=TPP1 PE=1 SV=70                                                            | O14773 (+1) |
| 195 | GDP dissociation inhibitor beta isoform Iso 1  HomoSapiens  GN=GDID2 PE=1 SV=84                             | P50395      |
| 196 | protein Rab-8 isoform Iso 1  HomoSapiens  GN=RALB PE=1 SV=51                                                | P11234      |
| 197 | S100-A11 isoform Iso 1  HomoSapiens  GN=S100A11 PE=1 SV=33                                                  | P31949      |
| 198 | peptide receptor 2 isoform Iso 1  HomoSapiens  GN=PPR2 PE=2 SV=27                                           | P25090      |
| 199 | plant pathogenesis-related protein 1 isoform Iso 1  HomoSapiens  GN=GLIPR2 PE=1 SV=40                       | Q9H4G4      |
| 200 | alpha Fc receptor isoform A.1  HomoSapiens  GN=FCAR PE=1 SV=44                                              | P24071      |
| 201 | protein 1 isoform Iso 1  HomoSapiens  GN=FMNL1 PE=1 SV=51                                                   | Q95466 (+1) |
| 202 | myosin-Ig isoform Iso 1  HomoSapiens  GN=MYO1G PE=1 SV=87                                                   | B01172      |
| 203 | protein 2/3 complex subunit 1B isoform Iso 1  HomoSapiens  GN=ARPC1B PE=1 SV=57                             | O15143      |
| 204 | disulfide-isomerase A4 isoform Iso 1  HomoSapiens  GN=PDIA4 PE=1 SV=97                                      | P13667      |
| 205 | alpha chain, erythrocyte isoform Iso 1  HomoSapiens  GN=SPTA1 PE=1 SV=61                                    | P02549 (+1) |
| 206 | protein 2 isoform Iso 1  HomoSapiens  GN=ACTR2 PE=1 SV=61                                                   | P61160      |
| 207 | XRP2 isoform Iso 1  HomoSapiens  GN=RP2 PE=1 SV=60                                                          | O75695      |
| 208 | isoform Iso 1  HomoSapiens  GN=MME PE=1 SV=65                                                               | P08473      |
| 209 | protein Rab-27A isoform Long  HomoSapiens  GN=RAB27A PE=1 SV=66                                             | P51159      |
| 210 | phosphoribosyltransferase isoform Iso 1  HomoSapiens  GN=NAMPT PE=1 SV=59                                   | P43490      |
| 211 | phospholipid-transporting ATPase IA isoform Iso 3  HomoSapiens  GN=ATP8A1 PE=1 SV=43                        | Q9Y2Q0.3    |
| 212 | mutase 1 isoform Iso 1  HomoSapiens  GN=PGAM1 PE=1 SV=78                                                    | P18669      |

|     |                                                                                                            |             |
|-----|------------------------------------------------------------------------------------------------------------|-------------|
| 213 | nucleotide-binding protein G(k) subunit alpha isoform Iso 1  HomoSapiens  GN=GNAI3 PE=1 SV=76              | P08754      |
| 214 | hydrolase isoform Iso 1  HomoSapiens  GN=GGH PE=1 SV=62                                                    | Q92820      |
| 215 | ligase 1 isoform Iso 1  HomoSapiens  GN=ACSL1 PE=1 SV=70                                                   | P33121      |
| 216 | enzyme subunit alpha, mitochondrial isoform Iso 1  HomoSapiens  GN=HADHA PE=1 SV=96                        | P40939      |
| 217 | anion-selective channel protein 1 isoform Iso 1  HomoSapiens  GN=VDAC1 PE=1 SV=83                          | P21796      |
| 218 | intracellular channel protein 1 isoform Iso 1  HomoSapiens  GN=CLIC1 PE=1 SV=136                           | Q00299      |
| 219 | Ras-related protein Rab-1C isoform Iso 1  HomoSapiens  GN=RAB1C PE=5 SV=35                                 | Q92928 (+1) |
| 220 | dismutase [Mn], mitochondrial isoform Iso 1  HomoSapiens  GN=SOD2 PE=1 SV=151                              | P04179      |
| 221 | beta chain, brain isoform Long  HomoSapiens  GN=SPTBN1 PE=1 SV=206                                         | Q01082 (+2) |
| 222 | repeat-containing protein 1 isoform Iso 1  HomoSapiens  GN=WDR1 PE=1 SV=66                                 | O75083      |
| 223 | reticulum calcium ATPase 3 isoform SERCA3B  HomoSapiens  GN=ATP2A3 PE=1 SV=65                              | Q93084 (+6) |
| 224 | isoform Iso 1  HomoSapiens  GN=SERPINA3 PE=1 SV=207                                                        | P10111      |
| 225 | H3.2 isoform Iso 1  HomoSapiens  GN=HIST2H3A;HIST2H3C;HIST2H3D PE=1 SV=106                                 | Q17D13      |
| 226 | protein Rab-7a isoform Iso 1  HomoSapiens  GN=RAB7A PE=1 SV=69                                             | P51149      |
| 227 | protein 2/3 complex subunit 3 isoform Iso 1  HomoSapiens  GN=ARPC3 PE=1 SV=51                              | O15145      |
| 228 | isoform Iso 1  HomoSapiens  GN=CNN2 PE=1 SV=44                                                             | Q99439      |
| 229 | H2B type 1-J isoform Iso 1  HomoSapiens  GN=HIST1H2BJ PE=1 SV=69                                           | P06899 (+3) |
| 230 | protein isoform Iso 1  HomoSapiens  GN=CAPG PE=1 SV=47                                                     | P40121      |
| 231 | domain-containing protein 2 isoform Iso 1  HomoSapiens  GN=SUN2 PE=1 SV=51                                 | Q9UH99      |
| 232 | dehydrogenase, mitochondrial isoform Iso 1  HomoSapiens  GN=DLD PE=1 SV=69                                 | P09622      |
| 233 | unc-13 homolog D isoform Iso 1  HomoSapiens  GN=UNC13D PE=1 SV=43                                          | Q70199 (+1) |
| 234 | 17-beta-dehydrogenase 11 isoform Iso 1  HomoSapiens  GN=HSD17B11 PE=1 SV=62                                | Q8NBQ5      |
| 235 | long-chain specific acyl-CoA dehydrogenase, mitochondrial isoform Iso 1  HomoSapiens  GN=ACADVL PE=1 SV=73 | P49748 (+1) |
| 236 | isomerase isoform Iso 2  HomoSapiens  GN=TP1 PE=1 SV=124                                                   | P60174 (+1) |
| 237 | isoform Iso 3  HomoSapiens  GN=RTN3 PE=1 SV=47                                                             | O95197.3    |
| 238 | module-containing mucin-like hormone receptor-like 3 isoform Iso 1  HomoSapiens  GN=EMR3 PE=1 SV=72        | Q98Y15 (+1) |
| 239 | factor Tu, mitochondrial isoform Iso 1  HomoSapiens  GN=TUFM PE=1 SV=73                                    | P49411      |
| 240 | cytosol factor 2 isoform Iso 1  HomoSapiens  GN=NCF2 PE=1 SV=44                                            | P19878      |
| 241 | proton ATPase catalytic subunit A isoform Iso 1  HomoSapiens  GN=ATP6V1A PE=1 SV=95                        | P38606      |
| 242 | isoform Iso 1  HomoSapiens  GN=SDCBP PE=1 SV=61                                                            | O00560 (+2) |
| 243 | protein 2/3 complex subunit 5 isoform Iso 1  HomoSapiens  GN=ARPC5 PE=1 SV=39                              | O15511      |
| 244 | D isoform Iso 1  HomoSapiens  GN=CTSD PE=1 SV=84                                                           | P07339      |
| 245 | G-protein coupled receptor 97 isoform Iso 1  HomoSapiens  GN=GPR97 PE=1 SV=39                              | Q86Y34      |
| 246 | protein sorting-associated protein 35 isoform Iso 1  HomoSapiens  GN=VPS35 PE=1 SV=64                      | Q96QK1      |
| 247 | protein 1 isoform Iso 2  HomoSapiens  GN=SYPL1 PE=1 SV=36                                                  | Q15653.2    |
| 248 | proton ATPase subunit d 1 isoform Iso 1  HomoSapiens  GN=ATP6V0D1 PE=1 SV=60                               | P61421      |
| 249 | isoform Iso 1  HomoSapiens  GN=CPNE2 PE=1 SV=26                                                            | Q96FN4      |
| 250 | factor 1-alpha 1 isoform Iso 1  HomoSapiens  GN=EEF1A1 PE=1 SV=87                                          | P68104 (+1) |
| 251 | b5 reductase 3 isoform Iso 1  HomoSapiens  GN=CYB5R3 PE=1 SV=89                                            | P00387 (+2) |
| 252 | facilitator superfamily domain-containing protein 10 isoform Iso 1  HomoSapiens  GN=MFS010 PE=1 SV=27      | Q14728      |
| 253 | factor-like protein 8B isoform Iso 1  HomoSapiens  GN=ARL8B PE=1 SV=44                                     | Q9NVJ2      |
| 254 | glucosyltransferase 1 isoform Iso 1  HomoSapiens  GN=UGGT1 PE=1 SV=81                                      | Q9NYU2 (+1) |
| 255 | STEAP4 isoform Iso 1  HomoSapiens  GN=STEAP4 PE=1 SV=35                                                    | Q687X5      |
| 256 | isoform Iso 1  HomoSapiens  GN=VNN1 PE=1 SV=58                                                             | O95497      |
| 257 | anion-selective channel protein 2 isoform Iso 1  HomoSapiens  GN=VDAC2 PE=1 SV=73                          | P45880 (+2) |
| 258 | kinase Fgr isoform Iso 1  HomoSapiens  GN=FGR PE=1 SV=63                                                   | P09769      |
| 259 | phosphoprotein isoform Iso 1  HomoSapiens  GN=VASP PE=1 SV=62                                              | P50552      |
| 260 | enzyme subunit beta, mitochondrial isoform Iso 1  HomoSapiens  GN=HADHB PE=1 SV=85                         | P55084      |
| 261 | isoform Iso 1  HomoSapiens  GN=GALNS PE=1 SV=52                                                            | P34059      |
| 262 | class I histocompatibility antigen, A-3 alpha chain isoform Iso 1  HomoSapiens  GN=HLA-A PE=1 SV=61        | P04439      |
| 263 | isoform Iso 1  HomoSapiens  GN=CPNE1 PE=1 SV=46                                                            | Q99829      |
| 264 | isoform Iso 2  HomoSapiens  GN=RTN4 PE=1 SV=69                                                             | Q9NQC3.2    |
| 265 | hydrogen channel 1 isoform Iso 1  HomoSapiens  GN=HVCN1 PE=1 SV=35                                         | Q96096      |
| 266 | component 1 Q subcomponent-binding protein, mitochondrial isoform Iso 1  HomoSapiens  GN=C1QBIP PE=1 SV=49 | Q07021      |
| 267 | dehydrogenase B chain isoform Iso 1  HomoSapiens  GN=LDBH PE=1 SV=104                                      | P07195      |
| 268 | protein Rab-11B isoform Iso 1  HomoSapiens  GN=RAB11B PE=1 SV=40                                           | Q15907      |
| 269 | transporter 4 isoform Iso 1  HomoSapiens  GN=SLC16A3 PE=1 SV=55                                            | Q15427      |
| 270 | subunit alpha isoform Iso 1  HomoSapiens  GN=HEXA PE=1 SV=89                                               | P06865      |
| 271 | deiminase type-2 isoform Iso 1  HomoSapiens  GN=PADI2 PE=1 SV=50                                           | Q9Y2J8      |
| 272 | S100-A4 isoform Iso 1  HomoSapiens  GN=S100A4 PE=1 SV=43                                                   | P26447      |
| 273 | cell death 6-interacting protein isoform Iso 1  HomoSapiens  GN=PDCC6IP PE=1 SV=100                        | Q8WUM4      |
| 274 | isoform Iso 1  HomoSapiens  GN=PHB2 PE=1 SV=61                                                             | Q99623      |
| 275 | kinase C delta type isoform Iso 1  HomoSapiens  GN=PRKCD PE=1 SV=76                                        | O05655      |
| 276 | FMR1-interacting protein 2 isoform Iso 1  HomoSapiens  GN=CYFIP2 PE=1 SV=103                               | Q96F07 (+1) |
| 277 | anion-selective channel protein 3 isoform Iso 1  HomoSapiens  GN=VDAC3 PE=1 SV=62                          | Q9V277 (+1) |
| 278 | type I cuticular Ha1 isoform Iso 1  HomoSapiens  GN=KRT31 PE=1 SV=44                                       | Q15323      |
| 279 | glycosyltransferase 48 kDa subunit isoform Iso 1  HomoSapiens  GN=DDOST PE=1 SV=71                         | P39656      |
| 280 | beta chain, erythrocyte isoform Iso 1  HomoSapiens  GN=SPTB PE=1 SV=72                                     | P11277 (+2) |
| 281 | proton ATPase subunit E 1 isoform Iso 1  HomoSapiens  GN=ATP6V1E1 PE=1 SV=56                               | P36543 (+1) |
| 282 | modifier-activating enzyme 1 isoform Iso 1  HomoSapiens  GN=UBA1 PE=1 SV=141                               | Q22314      |
| 283 | GTPase-activating-like protein IQGAP2 isoform Iso 1  HomoSapiens  GN=IQGAP2 PE=1 SV=67                     | Q13576      |
| 284 | A7 isoform Iso 1  HomoSapiens  GN=ANXA7 PE=1 SV=48                                                         | P20073 (+1) |
| 285 | SDR family member 7 isoform Iso 1  HomoSapiens  GN=DHR57 PE=1 SV=44                                        | Q9Y394 (+1) |
| 286 | uniporter protein, mitochondrial isoform Iso 1  HomoSapiens  GN=MCU PE=1 SV=49                             | Q8NE86 (+1) |
| 287 | protein Rab-31 isoform Iso 1  HomoSapiens  GN=RAB31 PE=1 SV=38                                             | Q13636      |
| 288 | phosphatase non-receptor type substrate 1 isoform Iso 1  HomoSapiens  GN=SHRPA PE=1 SV=70                  | P78324 (+2) |
| 289 | synaptotagmin-1 isoform Iso 1  HomoSapiens  GN=ESYT1 PE=1 SV=110                                           | Q9BSJ8 (+1) |
| 290 | carrier family 15 member 4 isoform Iso 1  HomoSapiens  GN=SLC15A4 PE=1 SV=45                               | Q8N697      |
| 291 | isoform Iso 1  HomoSapiens  GN=PLEK PE=1 SV=43                                                             | P08567      |
| 292 | nucleoside phosphorylase isoform Iso 1  HomoSapiens  GN=PNP PE=1 SV=83                                     | P00491      |
| 293 | protein Rab-5C isoform Iso 1  HomoSapiens  GN=RAB5C PE=1 SV=65                                             | P51148      |
| 294 | protein Rab-3D isoform Iso 1  HomoSapiens  GN=RAB3D PE=1 SV=45                                             | O95716      |
| 295 | type II cuticular Hb6 isoform Iso 1  HomoSapiens  GN=KRT86 PE=1 SV=67                                      | Q43790      |
| 296 | isoform Iso 1  HomoSapiens  GN=NPTN PE=1 SV=60                                                             | Q9Y639 (+4) |
| 297 | phosphatase non-receptor type 6 isoform Iso 1  HomoSapiens  GN=PTPN6 PE=1 SV=61                            | P29350 (+1) |
| 298 | isoform Iso 1  HomoSapiens  GN=BSG PE=1 SV=84                                                              | P35613 (+1) |
| 299 | nucleotide-binding protein G(I)/G(S)/G(T) subunit beta-1 isoform Iso 1  HomoSapiens  GN=GNB1 PE=1 SV=84    | P62873      |
| 300 | factor 1 isoform Iso 1  HomoSapiens  GN=OSTF1 PE=1 SV=29                                                   | Q92882      |
| 301 | phosphatase PP1-alpha catalytic subunit isoform Iso 1  HomoSapiens  GN=PPP1CA PE=1 SV=74                   | P62136      |
| 302 | S100-P isoform Iso 1  HomoSapiens  GN=S100P PE=1 SV=32                                                     | P25815      |
| 303 | type I cuticular Ha2 isoform Iso 1  HomoSapiens  GN=KRT32 PE=1 SV=32                                       | Q14532      |
| 304 | protein, mitochondrial isoform Iso 1  HomoSapiens  GN=HSPA9 PE=1 SV=92                                     | P38646      |
| 305 | isoform Iso 1  HomoSapiens  GN=ERLIN2 PE=1 SV=53                                                           | O94905      |
| 306 | H2A.Z isoform Iso 1  HomoSapiens  GN=H2AFZ PE=1 SV=50                                                      | POC055 (+2) |
| 307 | isoform Iso 1  HomoSapiens  GN=LGALS3 PE=1 SV=55                                                           | P17931      |
| 308 | isoform Iso 1  HomoSapiens  GN=PHB PE=1 SV=63                                                              | P35232      |
| 309 | pyrophosphatase/phosphodiesterase family member 4 isoform Iso 1  HomoSapiens  GN=ENPP4 PE=1 SV=35          | Q9Y6X5      |
| 310 | isoform Iso 1  HomoSapiens  GN=LNMN1 PE=1 SV=100                                                           | P20700      |
| 311 | isoform Iso 1  HomoSapiens  GN=PRDX6 PE=1 SV=91                                                            | P30041      |
| 312 | b-c1 complex subunit 2, mitochondrial isoform Iso 1  HomoSapiens  GN=UQCRC2 PE=1 SV=63                     | P22695      |
| 313 | protein Rap-2B isoform Iso 1  HomoSapiens  GN=RAP2B PE=1 SV=37                                             | P61225      |
| 314 | chemokine receptor type 2 isoform Iso 1  HomoSapiens  GN=CXCR2 PE=1 SV=33                                  | P25025      |
| 315 | S isoform Iso 1  HomoSapiens  GN=CTSS PE=1 SV=59                                                           | P25774 (+1) |
| 316 | kinase isoform Iso 1  HomoSapiens  GN=PDXX PE=1 SV=66                                                      | O00764      |
| 317 | protein Rap-1A isoform Iso 1  HomoSapiens  GN=RAP1A PE=1 SV=56                                             | P62834      |
| 318 | protein 1 isoform Iso 1  HomoSapiens  GN=LSP1 PE=1 SV=40                                                   | P33241      |
| 319 | scramblase 1 isoform Iso 1  HomoSapiens  GN=PLSCR1 PE=1 SV=31                                              | O15162      |

320 proton ATPase subunit S1 isoform Iso 1 |HomoSapiens| GN=ATP6AP1 PE=1 SV=56 Q15904  
321 2-oxoglutarate/malate carrier protein isoform Iso 1 |HomoSapiens| GN=SLC25A11 PE=1 SV=62 Q02978  
322 isoform Iso 1 |HomoSapiens| GN=TAGLN2 PE=1 SV=64 P37802  
323 subunit beta-1 isoform Iso 1 |HomoSapiens| GN=KPNB1 PE=1 SV=69 Q14974  
324 nucleotide-binding protein G(a) subunit alpha isoform Iso 1 |HomoSapiens| GN=GNAQ PE=1 SV=57 P50148  
325 locus protein 4 isoform Iso 1 |HomoSapiens| GN=SURF4 PE=1 SV=27 Q15260 (+1)  
326 integral-membrane protein VIP36 isoform Iso 1 |HomoSapiens| GN=LTMAN2 PE=1 SV=59 Q12907  
327 nuclear ribonucleoprotein K isoform Iso 3 |HomoSapiens| GN=HNRNP K PE=1 SV=84 P61978.3 (+2)  
328 protein Rab-8B isoform Iso 1 |HomoSapiens| GN=RAB8B PE=1 SV=35 Q92930  
329 speck-like protein containing a CARD isoform Iso 1 |HomoSapiens| GN=PYCARD PE=1 SV=37 Q9ULZ3 (+1)  
330 emp24 domain-containing protein 9 isoform Iso 1 |HomoSapiens| GN=TMED9 PE=1 SV=52 Q9BVK6  
331 domain-containing protein D2 isoform Iso 1 |HomoSapiens| GN=EFHD2 PE=1 SV=41 Q96C19  
332 GTPase-activating protein 1 isoform Iso 1 |HomoSapiens| GN=ARHGAP1 PE=1 SV=55 Q07960  
333 c oxidase subunit 2 isoform Iso 1 |HomoSapiens| GN=MT-CO2 PE=1 SV=50 P00403  
334 isoform Iso 1 |HomoSapiens| GN=GLRX PE=1 SV=46 P35754  
335 kDa heat shock protein, mitochondrial isoform Iso 1 |HomoSapiens| GN=HSPA1 PE=1 SV=49 P61604  
336 isoform Iso 1 |HomoSapiens| GN=EZR PE=1 SV=99 P15311  
337 1A1 isoform Iso 1 |HomoSapiens| GN=SULT1A1 PE=1 SV=92 P50225 (+1)  
338 acyltransferase 2 isoform Iso 1 |HomoSapiens| GN=LPCAT2 PE=1 SV=56 Q7LSN7  
339 homolog subfamily C member 13 isoform Iso 1 |HomoSapiens| GN=DNAC13 PE=1 SV=88 Q75165  
340 class I histocompatibility antigen, B-7 alpha chain isoform Iso 1 |HomoSapiens| GN=HLA-B PE=1 SV=68 P01889  
341 nucleotide-binding protein G(I)/G(S)/G(O) subunit gamma-2 isoform Iso 1 |HomoSapiens| GN=GN2 PE=1 SV=51 P59768  
342 integrator 2 isoform Iso 1 |HomoSapiens| GN=BIN2 PE=1 SV=30 Q9UBW5  
343 secretory protein E1 isoform Iso 1 |HomoSapiens| GN=NPC2 PE=1 SV=60 P61916  
344 synthase subunit d, mitochondrial isoform Iso 1 |HomoSapiens| GN=ATP5H PE=1 SV=40 Q75947 (+1)  
345 homolog subfamily C member 5 isoform Iso 1 |HomoSapiens| GN=DNAC5 PE=1 SV=55 Q9H324 (+1)  
346 T2 isoform Iso 1 |HomoSapiens| GN=RNASET2 PE=1 SV=47 O00584  
347 isoform Iso 1 |HomoSapiens| GN=TSPAN14 PE=1 SV=48 Q8NG11 (+1)  
348 isoform Iso 1 |HomoSapiens| GN=CHIT1 PE=1 SV=60 Q13231 (+2)  
349 activator complex subunit 1 isoform Iso 1 |HomoSapiens| GN=PSME1 PE=1 SV=48 Q06323  
350 antigen isoform Iso 1 |HomoSapiens| GN=CD44 PE=1 SV=70 P16070 (+15)  
351 Niban isoform Iso 1 |HomoSapiens| GN=FAM129A PE=1 SV=39 Q9BZ08  
352 uridylyltransferase isoform Iso 1 |HomoSapiens| GN=UGP2 PE=1 SV=93 Q16851 (+1)  
353 isoform Iso 1 |HomoSapiens| GN=FCN1 PE=1 SV=39 Q00602  
354 alpha-4A chain isoform Iso 1 |HomoSapiens| GN=TUBA4A PE=1 SV=138 P68366  
355 acyl-coenzyme A oxidase 1 isoform Iso 1 |HomoSapiens| GN=ACOX1 PE=1 SV=66 Q15067 (+1)  
356 vault protein isoform Iso 1 |HomoSapiens| GN=MVP PE=1 SV=61 Q14764  
357 17-beta-dehydrogenase 12 isoform Iso 1 |HomoSapiens| GN=HSD17B12 PE=1 SV=67 Q53G00  
358 synthase subunit O, mitochondrial isoform Iso 1 |HomoSapiens| GN=ATP5O PE=1 SV=59 P48047  
359 protein 2 isoform Iso 1 |HomoSapiens| GN=STXB2 PE=1 SV=79 Q15833 (+1)  
360 dehydrogenase, mitochondrial isoform Iso 1 |HomoSapiens| GN=GPD2 PE=1 SV=86 P43304 (+1)  
361 and metalloproteinase domain-containing protein 10 isoform Iso 1 |HomoSapiens| GN=ADAM10 PE=1 SV=81 Q14672  
362 B receptor isoform Iso 1 |HomoSapiens| GN=APOBR PE=1 SV=101 Q0V083 (+1)  
363 vav isoform Iso 1 |HomoSapiens| GN=VAV1 PE=1 SV=48 P15498  
364 glycosyltransferase subunit STT3B isoform Iso 1 |HomoSapiens| GN=STT3B PE=1 SV=70 Q8TCJ2  
365 protein 2/3 complex subunit 4 isoform Iso 1 |HomoSapiens| GN=ARPC4 PE=1 SV=32 P59998  
366 emp24 domain-containing protein 10 isoform Iso 1 |HomoSapiens| GN=TMED10 PE=1 SV=58 P49755  
367 protein eta isoform Iso 1 |HomoSapiens| GN=YWHAE PE=1 SV=75 Q04917  
368 heavy chain isoform Iso 1 |HomoSapiens| GN=FTH1 PE=1 SV=69 P02794  
369 reticulum aminopeptidase 1 isoform Iso 1 |HomoSapiens| GN=ERAP1 PE=1 SV=69 Q9NZ08 (+1)  
370 histone macro-H2A.1 isoform Iso 2 |HomoSapiens| GN=H2AFY PE=1 SV=69 Q75367 (+2)  
371 mitochondrial carrier protein SCA1 isoform Iso 1 |HomoSapiens| GN=SLC25A24 PE=1 SV=53 Q6NUK1  
372 Z isoform Iso 1 |HomoSapiens| GN=CTS2 PE=1 SV=57 Q9UBR2  
373 protein 43 isoform Iso 1 |HomoSapiens| GN=TMEM43 PE=1 SV=59 Q9BTV4  
374 of cytokinesis protein 2 isoform Iso 1 |HomoSapiens| GN=DOCK2 PE=1 SV=42 Q92608  
375 isoform Iso 1 |HomoSapiens| GN=TXN PE=1 SV=58 P10599  
376 recognition protein 1 isoform Iso 1 |HomoSapiens| GN=PGLYRP1 PE=1 SV=34 Q75594  
377 lectin domain family 5 member A isoform Iso 1 |HomoSapiens| GN=CLECSA PE=1 SV=52 Q9NY25  
378 diphosphate kinase B isoform Iso 3 |HomoSapiens| GN=NME2 PE=1 SV=103 P22392.2  
379 acyltransferase 7 isoform Iso 1 |HomoSapiens| GN=MBOAT7 PE=1 SV=36 Q96N66  
380 synthase subunit f, mitochondrial isoform Iso 1 |HomoSapiens| GN=ATP5I2 PE=1 SV=31 P56134 (+1)  
381 anhydrase 4 isoform Iso 1 |HomoSapiens| GN=CA4 PE=1 SV=58 P22748  
382 subunit delta isoform Iso 1 |HomoSapiens| GN=HBD PE=1 SV=88 P02042  
383 S-transferase omega-1 isoform Iso 1 |HomoSapiens| GN=GSTO1 PE=1 SV=72 P78417  
384 protective protein isoform Iso 1 |HomoSapiens| GN=CTSA PE=1 SV=71 P10619  
385 transmembrane protein 4 isoform Iso 1 |HomoSapiens| GN=TMX4 PE=1 SV=42 Q9H1E5  
386 c oxidase subunit 5B, mitochondrial isoform Iso 1 |HomoSapiens| GN=COX5B PE=1 SV=36 P10606  
387 dehydrogenase type-2 isoform Iso 1 |HomoSapiens| GN=HSD17B10 PE=1 SV=76 Q99714  
388 peptidase 1 isoform Iso 1 |HomoSapiens| GN=CTSC PE=1 SV=106 P53634  
389 phosphoesterase domain-containing protein 1 isoform Iso 1 |HomoSapiens| GN=CPED1 PE=1 SV=62 Q98R8F  
390 kinase 2, mitochondrial isoform Iso 1 |HomoSapiens| GN=AK2 PE=1 SV=70 P54819 (+2)  
391 peptidase complex catalytic subunit SEC11A isoform Iso 1 |HomoSapiens| GN=SEC11A PE=1 SV=41 P67812  
392 carrier organic anion transporter family member 4C1 isoform Iso 1 |HomoSapiens| GN=SLCO4C1 PE=1 SV=35 Q6ZQ07  
393 homolog subfamily B member 11 isoform Iso 1 |HomoSapiens| GN=DNAJB11 PE=1 SV=54 Q9UB54  
394 protein epsilon isoform Iso 1 |HomoSapiens| GN=YWHAH PE=1 SV=102 P62258 (+1)  
395 domain death agonist isoform Iso 1 |HomoSapiens| GN=BID PE=1 SV=61 P59957 (+2)  
396 reticulum resident protein 44 isoform Iso 1 |HomoSapiens| GN=ERP44 PE=1 SV=37 Q9BS26  
397 factor 4 isoform Iso 1 |HomoSapiens| GN=PF4 PE=1 SV=37 P02776  
398 KRas isoform 2B |HomoSapiens| GN=KRAS PE=1 SV=77 P01116.2  
399 dehydrogenase, mitochondrial isoform Iso 1 |HomoSapiens| GN=ALDH4A1 PE=1 SV=76 P30038  
400 maturation factor gamma isoform Iso 1 |HomoSapiens| GN=GMFG PE=1 SV=39 Q06234  
401 with coiled-coil, ANK repeat and PH domain-containing protein 1 isoform Iso 1 |HomoSapiens| GN=ACAP1 PE=1 SV=32 Q15027  
402 histocompatibility protein HA-1 isoform Iso 1 |HomoSapiens| GN=HIMHA1 PE=1 SV=40 Q92619  
403 protein Rab-14 isoform Iso 1 |HomoSapiens| GN=RAB14 PE=1 SV=56 P61106  
404 catalytic subunit isoform Iso 1 |HomoSapiens| GN=CAPN1 PE=1 SV=79 P07384  
405 endoplasmic bifunctional protein isoform Iso 1 |HomoSapiens| GN=H6PD PE=1 SV=63 Q95479  
406 phosphatase 2A 65 kDa regulatory subunit A alpha isoform Iso 1 |HomoSapiens| GN=PPP2R1A PE=1 SV=84 P30153  
407 S-transferase kappa 1 isoform Iso 1 |HomoSapiens| GN=GSTK1 PE=1 SV=73 Q9Y2Q3  
408 H1.3 isoform Iso 1 |HomoSapiens| GN=HIST1H1D PE=1 SV=62 P16402 (+2)  
409 c1, heme protein, mitochondrial isoform Iso 1 |HomoSapiens| GN=CYC1 PE=1 SV=72 P08574  
410 kinase 10 isoform Iso 1 |HomoSapiens| GN=STK10 PE=1 SV=60 Q94804  
411 proton ATPase 116 kDa subunit a isoform Iso 2 |HomoSapiens| GN=ATP6V0A1 PE=1 SV=67 Q93050 (+1)  
412 up-regulated protein 1 isoform Iso 1 |HomoSapiens| GN=HYOU1 PE=1 SV=89 Q9Y411  
413 immunoglobulin-like receptor subfamily B member 2 isoform Iso 1 |HomoSapiens| GN=LILRB2 PE=1 SV=63 Q8N423 (+1)  
414 complex subunit beta-1 isoform A |HomoSapiens| GN=AP1B1 PE=1 SV=76 Q10567 (+2)  
415 protein Rab-21 isoform Iso 1 |HomoSapiens| GN=RAB21 PE=1 SV=61 Q9UL25  
416 acetyltransferase, mitochondrial isoform Iso 1 |HomoSapiens| GN=ACAT1 PE=1 SV=78 P24752  
417 b-c1 complex subunit 1, mitochondrial isoform Iso 1 |HomoSapiens| GN=UQCRC1 PE=1 SV=63 P31930  
418 H1.5 isoform Iso 1 |HomoSapiens| GN=HIST1H1B PE=1 SV=59 P16401  
419 GTPase-activating protein 9 isoform Iso 1 |HomoSapiens| GN=ARHGAP9 PE=1 SV=30 Q98RR9 (+1)  
420 glycoprotein isoform Iso 1 |HomoSapiens| GN=CD59 PE=1 SV=79 P13987  
421 beta-4B chain isoform Iso 1 |HomoSapiens| GN=TUBB4B PE=1 SV=145 P68371  
422 isoform Iso 1 |HomoSapiens| GN=ARG1 PE=1 SV=67 P05089 (+1)  
423 protein subunit alpha isoform Iso 1 |HomoSapiens| GN=SSR1 PE=1 SV=49 P43307  
424 c oxidase subunit 7A2, mitochondrial isoform Iso 1 |HomoSapiens| GN=COX7A2 PE=1 SV=26 P14406  
425 expression-enhancing protein 5 isoform Iso 1 |HomoSapiens| GN=REPS5 PE=1 SV=40 Q00765  
426 type II cuticular Hb5 isoform Iso 1 |HomoSapiens| GN=KRT85 PE=1 SV=75 P78386



427 initiation factor 4A-I isoform Iso 1 |HomoSapiens| GN=EIF4A1 PE=1 SV=95 P60842

428 protein kinase 14 isoform CSBP2 |HomoSapiens| GN=MAPK14 PE=1 SV=73 Q16539 (+1)

429 protein theta isoform Iso 1 |HomoSapiens| GN=YWHAQ PE=1 SV=91 P27348

430 receptor isoform Iso 1 |HomoSapiens| GN=SORL1 PE=1 SV=58 Q92673

431 synthase subunit b, mitochondrial isoform Iso 1 |HomoSapiens| GN=ATP5F1 PE=1 SV=46 P24539

432 B isoform Iso 1 |HomoSapiens| GN=ARSB PE=1 SV=57 P15848 (+1)

433 b5 type B isoform Iso 1 |HomoSapiens| GN=CYB5B PE=1 SV=47 Q43169

434 thiolase, peroxisomal isoform Iso 1 |HomoSapiens| GN=ACAA1 PE=1 SV=74 P09110

435 synthetase isozyme 2 isoform Iso 1 |HomoSapiens| GN=ADSS PE=1 SV=72 P30520

436 protein 1-like isoform Iso 1 |HomoSapiens| GN=NCKAP1L PE=1 SV=27 P55160

437 and cell motility protein 1 isoform Iso 1 |HomoSapiens| GN=ELMO1 PE=1 SV=40 Q92556

438 isoform Iso 1 |HomoSapiens| GN=HP PE=1 SV=200 P00738

439 domain-binding glutamic acid-rich-like protein isoform Iso 1 |HomoSapiens| GN=SH3BGLR PE=1 SV=30 O75368

440 protein isoform Iso 1 |HomoSapiens| GN=TSPO PE=1 SV=39 P30536

441 reductase, mitochondrial isoform Mitochondrial |HomoSapiens| GN=GSR PE=1 SV=71 P00390 (+4)

442 factor 2 isoform Iso 1 |HomoSapiens| GN=EEF2 PE=1 SV=116 P13639

443 isoform Iso 1 |HomoSapiens| GN=CORO1C PE=1 SV=76 Q9ULV4

444 domain-containing protein 12 isoform Iso 1 |HomoSapiens| GN=TXND12 PE=1 SV=46 Q95881

445 and immunoglobulin domain-containing protein 8 isoform Iso 1 |HomoSapiens| GN=VSI8 PE=1 SV=24 Q5VU13

446 hydratase, mitochondrial isoform Iso 1 |HomoSapiens| GN=ECHS1 PE=1 SV=74 P30084

447 B6 isoform Iso 1 |HomoSapiens| GN=SERPINB6 PE=1 SV=70 P35237

448 reductase, mitochondrial isoform Iso 1 |HomoSapiens| GN=DECR1 PE=1 SV=76 Q16698

449 synthase, peroxisomal isoform Iso 1 |HomoSapiens| GN=AGP5 PE=1 SV=77 Q00116

450 phosphorylase isoform Iso 1 |HomoSapiens| GN=TYMP PE=1 SV=61 P19971

451 proton ATPase subunit B, brain isoform Isoform Iso 1 |HomoSapiens| GN=ATP6V1B2 PE=1 SV=60 P21281

452 isoform Iso 1 |HomoSapiens| GN=SLC17A5 PE=1 SV=28 Q9NRA2

453 pyrophosphatase 2, mitochondrial isoform Iso 2 |HomoSapiens| GN=PPA2 PE=1 SV=78 Q9H2U.2 (+1)

454 kinase isoform Iso 1 |HomoSapiens| GN=NAGK PE=1 SV=57 Q9U170

455 peptidase 2 isoform Iso 1 |HomoSapiens| GN=PPP7 PE=1 SV=62 Q9UHL4

456 isoform Iso 1 |HomoSapiens| GN=EMB PE=1 SV=61 Q6PCB8

457 cell death protein 6 isoform Iso 1 |HomoSapiens| GN=PDCC6 PE=1 SV=33 O75340

458 peptidase complex subunit 3 isoform Iso 1 |HomoSapiens| GN=SPCS3 PE=1 SV=31 P61009

459 lipid-transfer protein isoform SCPx |HomoSapiens| GN=SCP2 PE=1 SV=82 P22307 (+1)

460 isoform Iso 1 |HomoSapiens| GN=HK1 PE=1 SV=129 P19367 (+3)

461 protein gamma isoform Iso 1 |HomoSapiens| GN=YWHAG PE=1 SV=77 P61981

462 EVI2B isoform Iso 1 |HomoSapiens| GN=EVI2B PE=1 SV=34 P34910

463 kinase Fes/Fps isoform Iso 1 |HomoSapiens| GN=FES PE=1 SV=54 P07332 (+1)

464 protein 205 isoform Iso 1 |HomoSapiens| GN=TMEM205 PE=1 SV=33 Q6UW68

465 kinase C beta type isoform Beta+1 |HomoSapiens| GN=PRKCB PE=1 SV=77 P05771 (+1)

466 shock protein HSP 90-beta isoform Iso 1 |HomoSapiens| GN=HSP90AB1 PE=1 SV=142 P08338

467 glycoprotein 1 isoform Iso 1 |HomoSapiens| GN=ORM1 PE=1 SV=162 P02763

468 protein 1 subunit zeta isoform Iso 1 |HomoSapiens| GN=CCT6A PE=1 SV=62 P40227

469 carrier family 2, facilitated glucose transporter member 5 isoform Iso 1 |HomoSapiens| GN=SLC2A5 PE=1 SV=56 P27232

470 factor receptor-bound protein 2 isoform Iso 1 |HomoSapiens| GN=GRB2 PE=1 SV=71 P62993

471 protease 57 isoform Iso 1 |HomoSapiens| GN=PRSS57 PE=1 SV=45 Q6UWY2

472 protein 1 subunit delta isoform Iso 1 |HomoSapiens| GN=CCT4 PE=1 SV=77 P50991

473 activator complex subunit 2 isoform Iso 1 |HomoSapiens| GN=PSME2 PE=1 SV=53 Q9UL46

474 glucosidase isoform Iso 1 |HomoSapiens| GN=MOGS PE=1 SV=81 Q13724

475 of cytokinesis protein 8 isoform Iso 1 |HomoSapiens| GN=DOCK8 PE=1 SV=53 Q8NF50 (+2)

476 multivesicular body protein 4b isoform Iso 1 |HomoSapiens| GN=CHMP4B PE=1 SV=41 Q9H444

477 phosphatase, tissue-nonspecific isozyme isoform Iso 1 |HomoSapiens| GN=ALPL PE=1 SV=69 P05186

478 isoform Iso 1 |HomoSapiens| GN=CORO7 PE=1 SV=36 P57737 (+1)

479 family protein C6orf115 isoform Iso 1 |HomoSapiens| GN=C6orf115 PE=1 SV=29 Q9P1F3

480 protein Rab-5B isoform Iso 1 |HomoSapiens| GN=RAB5B PE=1 SV=51 P61020

481 acidic ribosomal protein P2 isoform Iso 1 |HomoSapiens| GN=RPLP2 PE=1 SV=47 P05387

482 protein p22 isoform Iso 1 |HomoSapiens| GN=CHP PE=1 SV=37 Q99653

483 transhydrogenase, mitochondrial isoform Iso 1 |HomoSapiens| GN=NNT PE=1 SV=84 Q13423

484 repeat-containing protein 3 isoform Iso 1 |HomoSapiens| GN=NHLRC3 PE=2 SV=33 Q51537

485 transfer flavoprotein subunit alpha, mitochondrial isoform Iso 1 |HomoSapiens| GN=ETFA PE=1 SV=64 P13804

486 isoform Br21 |HomoSapiens| GN=ANK1 PE=1 SV=54 P16157.21 (+16)

487 specific acyl-CoA dehydrogenase, mitochondrial isoform Iso 1 |HomoSapiens| GN=ACADM PE=1 SV=69 P11310 (+1)

488 alpha-11b isoform Iso 1 |HomoSapiens| GN=ITGA2B PE=1 SV=54 P08514

489 glucokinase isoform Iso 1 |HomoSapiens| GN=ADPGK PE=1 SV=45 Q9BRR6 (+1)

490 reductase isoform Iso 1 |HomoSapiens| GN=DCXR PE=1 SV=71 Q724W1

491 A isoform Iso 1 |HomoSapiens| GN=GLA PE=1 SV=69 P06280

492 glycoprotein 4 isoform Iso 1 |HomoSapiens| GN=CD36 PE=1 SV=92 P16671

493 protein C17orf62 isoform Iso 1 |HomoSapiens| GN=C17orf62 PE=1 SV=28 Q9BQA9

494 function-associated antigen 3 isoform Iso 1 |HomoSapiens| GN=CD58 PE=1 SV=40 P19256 (+2)

495 A dehydrogenase, mitochondrial isoform Iso 1 |HomoSapiens| GN=HADH PE=1 SV=99 Q16836 (+1)

496 homology domain-containing family O member 2 isoform Iso 1 |HomoSapiens| GN=PLEKHO2 PE=1 SV=23 Q8T055

497 dehydrogenase, cytoplasmic isoform Iso 1 |HomoSapiens| GN=MDH1 PE=1 SV=98 P40825

498 disulfide-isomerase TMX3 isoform Iso 1 |HomoSapiens| GN=TMX3 PE=1 SV=57 Q96J7

499 alpha-L isoform Iso 1 |HomoSapiens| GN=ITGAL PE=1 SV=85 P20701 (+2)

500 NipSnap homolog 3A isoform Iso 1 |HomoSapiens| GN=NIPSNAP3A PE=1 SV=39 Q9UWF0

501 S100-A3 isoform Iso 1 |HomoSapiens| GN=S100A3 PE=1 SV=28 P33764

502 protein 33 isoform Iso 1 |HomoSapiens| GN=TMEM33 PE=1 SV=40 P57088

503 GTPase-activating protein 4 isoform Iso 1 |HomoSapiens| GN=ARHGAP4 PE=1 SV=45 P98171 (+1)

504 expressed in FDCP 6 homolog isoform Iso 1 |HomoSapiens| GN=DEF6 PE=1 SV=46 Q9H4E7

505 carrier homolog 2 isoform Iso 1 |HomoSapiens| GN=MTCH2 PE=1 SV=49 Q9Y6C9

506 phospholipid-transporting ATPase IF isoform Iso 1 |HomoSapiens| GN=ATP11B PE=1 SV=56 Q9Y2G3

507 protein 4 isoform Iso 1 |HomoSapiens| GN=CKAP4 PE=1 SV=90 Q07065

508 isoform Iso 1 |HomoSapiens| GN=AGA PE=1 SV=57 P20933

509 domain-binding glutamic acid-rich-like protein 3 isoform Iso 1 |HomoSapiens| GN=SH3BGLR3 PE=1 SV=34 Q9H299

510 b-c1 complex subunit 9 isoform Iso 1 |HomoSapiens| GN=UQC10 PE=1 SV=27 Q9UDW1

511 proteasome non-ATPase regulatory subunit 6 isoform Iso 1 |HomoSapiens| GN=PSMD6 PE=1 SV=45 Q15008

512 RNA polymerase II transcriptional coactivator p15 isoform Iso 1 |HomoSapiens| GN=SUB1 PE=1 SV=52 P53999

513 homolog isoform Iso 1 |HomoSapiens| GN=IST1 PE=1 SV=48 P53990 (+3)

514 synthase isoform Iso 1 |HomoSapiens| GN=TBXAS1 PE=1 SV=115 P24557

515 inhibitor 1 isoform Iso 1 |HomoSapiens| GN=TM6IM6 PE=1 SV=39 P55061

516 isoform Iso 1 |HomoSapiens| GN=PLEC PE=1 SV=365 Q15149 (+8)

517 synthase subunit gamma, mitochondrial isoform Liver |HomoSapiens| GN=ATP5C1 PE=1 SV=44 P36542 (+1)

518 Pro-X carboxypeptidase isoform Iso 1 |HomoSapiens| GN=PRCP PE=1 SV=68 P42785

519 c oxidase subunit 5A, mitochondrial isoform Iso 1 |HomoSapiens| GN=COX5A PE=1 SV=45 P20674

520 isoform Iso 1 |HomoSapiens| GN=PRDX4 PE=1 SV=67 Q13162

521 subunit alpha type-5 isoform Iso 1 |HomoSapiens| GN=PSMA5 PE=1 SV=67 P28066

522 kinase-associated phosphoprotein 2 isoform Iso 1 |HomoSapiens| GN=SKAP2 PE=1 SV=27 O75563

523 c oxidase subunit 4 isoform 1, mitochondrial isoform Iso 1 |HomoSapiens| GN=COX4I1 PE=1 SV=55 P13073

524 protein Rap-2c isoform Iso 1 |HomoSapiens| GN=RAP2C PE=1 SV=40 Q9Y3L5

525 B isoform Iso 1 |HomoSapiens| GN=RNPEP PE=1 SV=70 Q9H4A4

526 protein SEC63 homolog isoform Iso 1 |HomoSapiens| GN=SEC63 PE=1 SV=36 Q9UGP8

527 dehydrogenase [ubiquinone] iron-sulfur subunit, mitochondrial isoform Iso 1 |HomoSapiens| GN=SDHB PE=1 SV=66 P21912

528 factor 6 isoform Iso 1 |HomoSapiens| GN=ARF6 PE=1 SV=49 P62330

529 1 isoform Iso 1 |HomoSapiens| GN=GGT1 PE=1 SV=70 P19440 (+3)

530 type I cuticular Ha4 isoform Iso 1 |HomoSapiens| GN=KRT34 PE=1 SV=35 Q76011

531 beta-1 chain isoform Iso 1 |HomoSapiens| GN=TUBB1 PE=1 SV=71 Q9H4B7

532 syndrome protein family member 2 isoform Iso 1 |HomoSapiens| GN=WASF2 PE=1 SV=39 Q9Y6W5 (+1)

533 necrosis factor alpha-induced protein 2 isoform Iso 1 |HomoSapiens| GN=TNFAIP2 PE=1 SV=37 Q03169

|     |                                                                                                                             |               |
|-----|-----------------------------------------------------------------------------------------------------------------------------|---------------|
| 534 | hydratase, mitochondrial isoform Iso 1  HomoSapiens  GN=ACO2 PE=1 SV=110                                                    | Q99798        |
| 535 | dehydrogenase-like oxidoreductase isoform Iso 1  HomoSapiens  GN=SCCPDH PE=1 SV=51                                          | Q8N8X0        |
| 536 | subunit alpha type-6 isoform Iso 1  HomoSapiens  GN=PSMA6 PE=1 SV=68                                                        | P60900        |
| 537 | GTP-binding protein C isoform Iso 1  HomoSapiens  GN=RRAGC PE=1 SV=51                                                       | Q9HB90 (+2)   |
| 538 | ERGIC-53 isoform Iso 1  HomoSapiens  GN=LMAN1 PE=1 SV=62                                                                    | P49257        |
| 539 | emp24 domain-containing protein 4 isoform Iso 1  HomoSapiens  GN=TMED4 PE=1 SV=44                                           | Q727H5 (+2)   |
| 540 | inhibitor isoform Iso 1  HomoSapiens  GN=RNH1 PE=1 SV=63                                                                    | P13489        |
| 541 | isoform Iso 1  HomoSapiens  GN=MANBA PE=1 SV=45                                                                             | O00462        |
| 542 | family CARD domain-containing protein 4 isoform Iso 1  HomoSapiens  GN=NLR4 PE=2 SV=23                                      | Q9NPP4 (+1)   |
| 543 | synthase-coupling factor 6, mitochondrial isoform Iso 1  HomoSapiens  GN=ATP5J PE=1 SV=43                                   | P18859        |
| 544 | proton ATPase subunit C 1 isoform Iso 1  HomoSapiens  GN=ATP6V1C1 PE=1 SV=62                                                | P21283        |
| 545 | c oxidase subunit 6B1 isoform Iso 1  HomoSapiens  GN=COX6B1 PE=1 SV=46                                                      | P14854        |
| 546 | protein kinase 1 isoform Iso 1  HomoSapiens  GN=MAPK1 PE=1 SV=100                                                           | P28482        |
| 547 | type I cuticular Ha5 isoform Iso 1  HomoSapiens  GN=KRT35 PE=1 SV=48                                                        | Q92764        |
| 548 | type I cytoskeletal 14 isoform Iso 1  HomoSapiens  GN=KRT14 PE=1 SV=109                                                     | P02533        |
| 549 | repeat-containing protein 15 isoform Iso 1  HomoSapiens  GN=LRR15 PE=1 SV=75                                                | Q8TF66 (+1)   |
| 550 | isoform Iso 1  HomoSapiens  GN=AHCY PE=1 SV=76                                                                              | P23526        |
| 551 | isoform Iso 1  HomoSapiens  GN=TOR1A PE=1 SV=49                                                                             | O14656        |
| 552 | kinase Lyn isoform Iso 2  HomoSapiens  GN=LYN PE=1 SV=88                                                                    | P07948.2      |
| 553 | necrosis factor alpha-induced protein 8 isoform Iso 1  HomoSapiens  GN=TNFAIP8 PE=1 SV=22                                   | O95379 (+2)   |
| 554 | reductase isoform Iso 1  HomoSapiens  GN=TECR PE=1 SV=59                                                                    | Q9N201        |
| 555 | RNA helicase DDX3X isoform Iso 1  HomoSapiens  GN=DDX3X PE=1 SV=87                                                          | O00571 (+1)   |
| 556 | A isoform Iso 1  HomoSapiens  GN=ARSA PE=1 SV=65                                                                            | P15289        |
| 557 | 1,4,5-trisphosphate receptor-interacting protein isoform Iso 1  HomoSapiens  GN=ITPRIP PE=1 SV=27                           | Q8IWB1        |
| 558 | phosphoribosyltransferase isoform Iso 1  HomoSapiens  GN=APRT PE=1 SV=70                                                    | P07741        |
| 559 | type II cytoskeletal 5 isoform Iso 1  HomoSapiens  GN=KRT5 PE=1 SV=148                                                      | P13647        |
| 560 | isoform B  HomoSapiens  GN=PLIN3 PE=1 SV=82                                                                                 | O60664 (+1)   |
| 561 | type II cytoskeletal 1b isoform Iso 1  HomoSapiens  GN=KRT77 PE=1 SV=50                                                     | Q72794        |
| 562 | synthase subunit g, mitochondrial isoform Iso 1  HomoSapiens  GN=ATP5L PE=1 SV=35                                           | O75964        |
| 563 | type I cuticular Ha3-II isoform Iso 1  HomoSapiens  GN=KRT33B PE=1 SV=41                                                    | Q14525        |
| 564 | domain-containing protein 88B isoform Iso 1  HomoSapiens  GN=CCDC88B PE=1 SV=40                                             | A6NC98 (+2)   |
| 565 | isoform Iso 1  HomoSapiens  GN=PLXNC1 PE=1 SV=46                                                                            | O60486        |
| 566 | leucine-rich nuclear phosphoprotein 32 family member E isoform Iso 1  HomoSapiens  GN=ANP32E PE=1 SV=41                     | Q9BTT0        |
| 567 | isomerase, mitochondrial isoform Iso 1  HomoSapiens  GN=ECH1 PE=1 SV=52                                                     | Q13011        |
| 568 | ETHE1, mitochondrial isoform Iso 1  HomoSapiens  GN=ETHE1 PE=1 SV=50                                                        | O95571        |
| 569 | isoform Iso 1  HomoSapiens  GN=TTR PE=1 SV=123                                                                              | P02766        |
| 570 | phosphatase 2A 56 kDa regulatory subunit alpha isoform Iso 1  HomoSapiens  GN=PPP2R5A PE=1 SV=39                            | Q15172 (+1)   |
| 571 | alanine-rich C-kinase substrate isoform Iso 1  HomoSapiens  GN=MARCKS PE=1 SV=49                                            | P29866        |
| 572 | b-c1 complex subunit 7 isoform Iso 1  HomoSapiens  GN=UQCRB PE=1 SV=41                                                      | P14927        |
| 573 | g-like protein 2 isoform Iso 1  HomoSapiens  GN=LYG2 PE=1 SV=24                                                             | Q865G7        |
| 574 | type I cytoskeletal 39 isoform Iso 1  HomoSapiens  GN=KRT39 PE=1 SV=21                                                      | Q6A163        |
| 575 | acid dehydratase isoform Iso 2  HomoSapiens  GN=ALAD PE=1 SV=91                                                             | P13716.2 (+1) |
| 576 | protein 2 isoform Iso 1  HomoSapiens  GN=HEBP2 PE=1 SV=34                                                                   | O9Y524 (+1)   |
| 577 | superfamily member 6 isoform Iso 1  HomoSapiens  GN=IGSF6 PE=2 SV=30                                                        | O95976        |
| 578 | acetyltransferase component of pyruvate dehydrogenase complex, mitochondrial isoform Iso 1  HomoSapiens  GN=DLAT PE=1 SV=74 | P10515        |
| 579 | transfer flavoprotein subunit beta isoform Iso 2  HomoSapiens  GN=ETFB PE=1 SV=67                                           | P38117.2 (+1) |
| 580 | alpha-4 chain isoform Iso 1  HomoSapiens  GN=TPM4 PE=1 SV=93                                                                | P67936        |
| 581 | dehydrogenase [ubiquinone] 1 alpha subcomplex subunit 5 isoform Iso 1  HomoSapiens  GN=NDUF5A PE=1 SV=37                    | Q16718        |
| 582 | protein 2 isoform Iso 1  HomoSapiens  GN=NBEAL2 PE=1 SV=29                                                                  | Q6ZNI1 (+2)   |
| 583 | family member X1 isoform Iso 1  HomoSapiens  GN=NLRX1 PE=1 SV=39                                                            | Q86UT6 (+1)   |

END OF FILE
